# Supplementary material
Source: Elsevier journal article supplement (https://www.sciencedirect.com/science/article/pii/S0211139X21000810)
Supplement: mmc1 [file S0211139X21000810:mmc1.docx]

**Anexo I. Estrategia de búsqueda.**

((((((((((((((((((((((((((((((("older"[Title/Abstract]) OR "older adult*"[Title/Abstract]) OR "older age"[Title/Abstract]) OR "older age*"[Title/Abstract]) OR "older people"[Title/Abstract]) OR "older person"*Title/Abstract+) OR “Older Men”*Title/Abstract+) OR “Older women”*Title/Abstract+) OR “Oldest Old”*Title/Abstract+) OR "elder"*Title/Abstract+) OR "elderly"*Title/Abstract+) OR elder*[Title/Abstract]) OR seniors[Title/Abstract]) OR senior[Title/Abstract]) OR senecent[Title/Abstract]) OR Senescence[Title/Abstract]) OR matured[Title/Abstract]) OR “postmenopausal women”*Title/Abstract+) OR “post-menopausal women”*Title/Abstract+) OR geriatric[Title/Abstract]) OR geriatric*[Title/Abstract]) OR "Biological Aging"[Title/Abstract]) OR "aged"*Title/Abstract+) OR aging*Title/Abstract+) OR “Ageing Men”*Title/Abstract+) OR “Ageing women”*Title/Abstract+) OR "Aging"*Mesh+) OR (("Aged, 80 and over"*Mesh+))) OR "Frail Elderly"[Mesh]))) AND (((((((((((((((((((((((((“High Intensity Interval training”*Title/Abstract+) OR “High-Intensity Interval Training”*Title/Abstract+) OR “High-Intensity Interval Trainings”*Title/Abstract+) OR “high intensity interval”*Title/Abstract+) OR “High Intensity Aerobic Interval Training”*Title/Abstract+) OR “High Intensity Interval Exercise”*Title/Abstract+) OR “High-Intensity Interval Exercise”*Title/Abstract+) OR “High Intensity Exercise”*Title/Abstract+) OR “High-Intensity Exercise”*Title/Abstract+) OR “High Intensity Intermittent Exercise”*Title/Abstract+) OR “High-Intensity Intermittent Exercises”*Title/Abstract+) OR “high intensity intermittent”*Title/Abstract+) OR “High Intensity Intermittent Training”*Title/Abstract+) OR “High Intensity Circuit Training”*Title/Abstract+) OR “High Intensity Training”*Title/Abstract+) OR “Interval Exercise”*Title/Abstract+) OR “interval training”*Title/Abstract+) OR “Interval training (exercise)"*Title/Abstract+) OR “Aerobic Interval Training”*Title/Abstract+) OR “Sprint Interval Training”*Title/Abstract+) OR “Sprint Interval Trainings”*Title/Abstract+) OR “sprint interval”*Title/Abstract+) OR “HIIT”*Title/Abstract+) OR “HIIE”*Title/Abstract+) OR "High-Intensity Interval Training"[Mesh])
